# Supplementary material
Source: publisher figshare collection journal article supplement (https://tandf.figshare.com/ndownloader/files/16907069)
Supplement: Supplementary file [file 16907069]

## Supporting information

### **Hyaluronic acid-functionalized bilosomes for targeted delivery of tripterine to inflamed area with enhance therapy on arthritis**

Hailing Yang <sup>a,b</sup>, Zhenjie Liu <sup>b</sup>, Yonglong Song <sup>c</sup>, Changjiang Hu <sup>a,\*</sup>

<sup>a</sup> School of Pharmacy, Chengdu University of Traditional Chinese Medicine, Chengdu 610072, China.

<sup>b</sup> School of Pharmacy, Guangxi University of Chinese Medicine, Nanning 530001 China.

<sup>c</sup> Department of Pharmacy, Anhui Medical College, Hefei 230601, China.

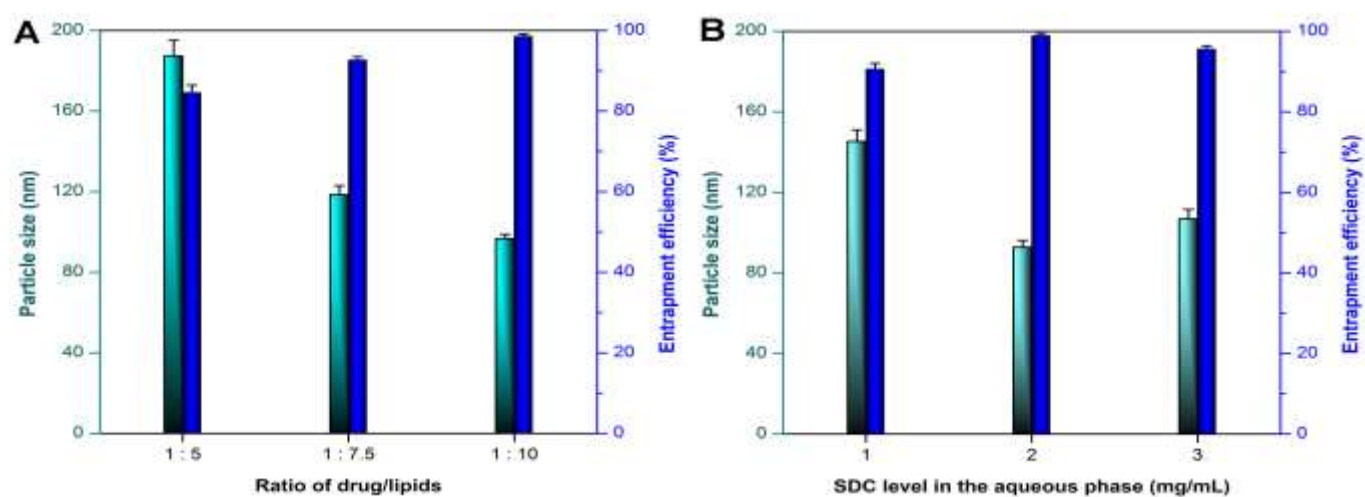

**Figure S1.** Formulation factors affecting the particle size and entrapment efficiency of Tri-loaded bilosomes: (A) the ratio of drug/lipids and (B) the level of sodium deoxycholate (SDC) in aqueous phase upon hydration.

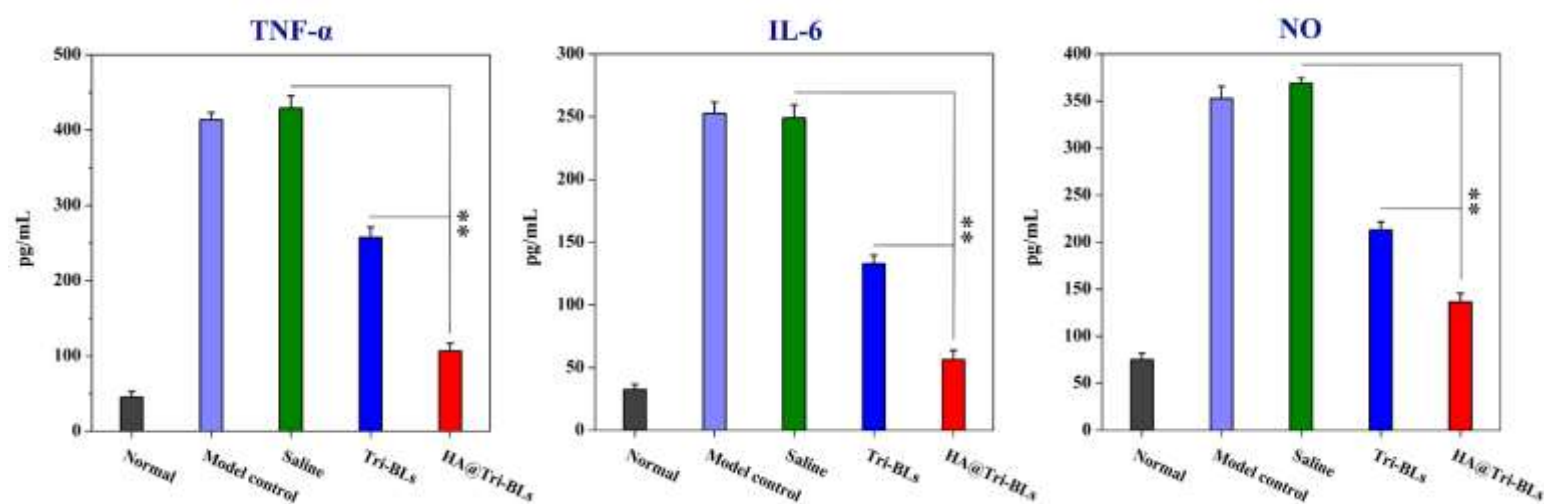

**Figure S2.** Serum levels of inflammatory mediators (TNF- $\alpha$ , IL-6 and NO) in adjuvant-induced arthritic mice following treatment with saline, Tri-BLs and HA@Tri-BLs. Data expressed as mean  $\pm$  SD ( $n = 3$ ). Statistic analysis: Paired  $t$ -test,  $**P < 0.01$ , HA@Tri-BLs significantly different Tri-BLs and saline.
